# Supplementary material for: Strategy for Sensitive and Specific Detection of Yersinia pestis in Skeletons of the Black Death Pandemic
Source: PLoS One. 2013 Sep 17;8(9):e75742. doi: 10.1371/journal.pone.0075742 (PMC3775804; doi:10.1371/journal.pone.0075742)
Supplement: Figure S2 — Alignment of partial pla and caf1 specific sequences. Despite the use of UDG, two CT transitions are present in aDNA sequences targeting the genes pla and caf1 that were aligned to the reference sequences (AL109969/AL117211). Those errors result from deamination of cytosine and are typical for aDNA. (PDF) [file pone.0075742.s003.pdf]

*pla*

```

ALL09969
B3 - #1
B3 - #2
MP17-I - #1
MP17-I - #2
MP17-I - #3
MP19-II - #1
MP19-II - #2
MP19-II - #3
MP59-I - #1
MP59-I - #2
MP59-I - #3
MFS1-I - #1
T
7320 7330 7340 7350 7360 7370 7380 7390 7400 7410 7420 7430 7440
GAC TGGGTT CCGGCACATGATAATGATGACACATATGAGAGATCTTTACCTTCGTCGAGAGACATCCGGCTCACCGTTATTATGGTACCGTAATTATGTCACCCCTAATGCCCAAGTCT

```

[illegible][illegible]
