# Supplementary material for: Strategy for Sensitive and Specific Detection of Yersinia pestis in Skeletons of the Black Death Pandemic
Source: PLoS One. 2013 Sep 17;8(9):e75742. doi: 10.1371/journal.pone.0075742 (PMC3775804; doi:10.1371/journal.pone.0075742)
Supplement: Table S1 — CP values and PCR results of all investigated samples. (XLSX) [file pone.0075742.s001.xlsx]

## Sheet: results - pla + HLA assays
					qPCR targeting pla																					conventional PCR targeting pla														qPCR targteing HLA and test for inhibitory substances
individual	methode of extraction	trial	eluat	material	run 1	run 2	run 3	run 4	run 5	run 6	run 7 (4 µl DNA)	run 8	run 9 (4 µl DNA)	run 10	run 11	run 12	run 13 (4 µl DNA)	run 14	run 15 (4 µl DNA)	run 16	run 17 (4 µl DNA)	run 18	run 19 (4 µl DNA)	summaryzing result: x/y positive		run 1	run 2	run 3	run 4 (4 µl DNA)	run 5	run 6	run 7 (4 µl DNA)	run 8 (4 µl DNA)	run 9	run 10 (4 µl DNA)	run 11	run 12 (4 µl DNA)	summaryzing result: x/y positive		Detection of HLA - run 1	inhibitiory test 1	Detection of HLA - run 2	inhibitiory test 2	Detection of HLA - run 3	inhibitiory test 3
B1	1	1	1	tooth, 16	neg	n.t.	n.t.	n.t.	n.t.	n.t.	n.t.	neg	n.t.	n.t.	n.t.	neg	n.t.	38.1	n.t.	n.t.	n.t.	n.t.	n.t.	1/4		neg	n.t.	neg	neg	n.t.	n.t.	n.t.	n.t.	n.t.	n.t.	n.t.	n.t.	0/3		neg	32.04	n. t.	n. t.	n.t.	n.t.
			2		n.t.	neg	n.t.	n.t.	n.t.	n.t.	n.t.	n.t.	n.t.	neg	n.t.	n.t.	n.t.	n.t.	n.t.	n.t.	n.t.	n.t.	n.t.	0/2		n.t.	n.t.	n.t.	n.t.	n.t.	n.t.	n.t.	n.t.	n.t.	n.t.	n.t.	n.t.	0/0		neg	n.t.	n. t.	n. t.	n.t.	n.t.
B2	1	1	1	tooth, 17	neg	n.t.	n.t.	n.t.	n.t.	n.t.	36.6	n.t.	35.08	n.t.	n.t.	n.t.	neg	n.t.	n.t.	n.t.	n.t.	n.t.	n.t.	2/4		neg	n.t.	n.t.	neg	neg	n.t.	n.t.	n.t.	n.t.	n.t.	n.t.	n.t.	0/3		n.t.	n.t.	n. t.	n. t.	n.t.	n.t.
			2		n.t.	neg	n.t.	n.t.	n.t.	n.t.	n.t.	n.t.	n.t.	n.t.	n.t.	n.t.	n.t.	n.t.	n.t.	n.t.	n.t.	n.t.	n.t.	0/1		n.t.	n.t.	n.t.	n.t.	n.t.	n.t.	n.t.	n.t.	n.t.	n.t.	n.t.	n.t.	0/0		neg	n.t.	n. t.	n. t.	n.t.	n.t.
	2	1	1					neg	n.t.	n.t.	n.t.	n.t.	neg	n.t.	n.t.	n.t.	n.t.	n.t.	n.t.	n.t.	n.t.	n.t.	n.t.	0/2		n.t.	n.t.	n.t.	n.t.	n.t.	n.t.	n.t.	n.t.	n.t.	n.t.	n.t.	n.t.	0/0		n.t.	n.t.	n. t.	n. t.	38.35	n.t.
			2					neg	n.t.	n.t.	n.t.	n.t.	n.t.	n.t.	n.t.	n.t.	n.t.	n.t.	n.t.	n.t.	n.t.	n.t.	n.t.	0/1		n.t.	n.t.	n.t.	n.t.	n.t.	n.t.	n.t.	n.t.	n.t.	n.t.	n.t.	n.t.	0/0		n.t.	n.t.	n. t.	n. t.	n.t.	n.t.
	2	2	1		n.t., extracts did not exist					neg	neg	n.t.	neg	n.t.	n.t.	n.t.	n.t.	n.t.	n.t.	n.t.	n.t.	n.t.	n.t.	0/3		n.t.	n.t.	n.t.	n.t.	n.t.	n.t.	n.t.	n.t.	n.t.	n.t.	n.t.	n.t.	0/0		n.t.	n.t.	n. t.	n. t.	38.83	n.t.
			2							neg	neg	n.t.	n.t.	n.t.	n.t.	n.t.	n.t.	n.t.	n.t.	n.t.	n.t.	n.t.	n.t.	0/2		n.t.	n.t.	n.t.	n.t.	n.t.	n.t.	n.t.	n.t.	n.t.	n.t.	n.t.	n.t.	0/0		n.t.	n.t.	n. t.	n. t.	n.t.	n.t.
	3	1	1											neg	n.t.	n.t.	n.t.	n.t.	n.t.	n.t.	n.t.	n.t.	n.t.	0/1		n.t.	n.t.	n.t.	neg	n.t.	n.t.	n.t.	n.t.	n.t.	n.t.	n.t.	n.t.	0/1		n.t., extracts did not exist				neg	34.39
			2											neg	n.t.	n.t.	n.t.	n.t.	n.t.	n.t.	n.t.	n.t.	n.t.	0/1		n.t.	n.t.	n.t.	n.t.	n.t.	n.t.	n.t.	n.t.	n.t.	n.t.	n.t.	n.t.	0/0						n.t.	n.t.
B3	1	1	1	tooth, 36	34.7	n.t.	n.t.	n.t.	n.t.	34.68	n.t.	34.62	n.t.	n.t.	n.t.	35.78	n.t.	n.t.	n.t.	n.t.	n.t.	n.t.	n.t.	4/4		pos	n.t.	n.t.	n.t.	neg	pos	n.t.	n.t.	n.t.	n.t.	n.t.	n.t.	2/3		n.t.	n.t.	n. t.	n. t.	n.t.	n.t.
			2		n.t.	38.29	n.t.	n.t.	n.t.	n.t.	n.t.	n.t.	38.29	n.t.	n.t.	n.t.	n.t.	n.t.	n.t.	n.t.	n.t.	n.t.	n.t.	2/2		n.t.	n.t.	neg	n.t.	n.t.	n.t.	n.t.	n.t.	n.t.	n.t.	n.t.	n.t.	0/1		n.t.	n.t.	n. t.	n. t.	n.t.	n.t.
	3	1	1		n.t., extracts did not exist										36.31	n.t.	n.t.	n.t.	n.t.	n.t.	n.t.	n.t.	n.t.	1/1		n.t., extracts did not exist					n.t.	n.t.	n.t.	n.t.	n.t.	n.t.	n.t.	0/0		n.t., extracts did not exist				n.t.	n.t.
			2												neg	n.t.	n.t.	n.t.	n.t.	n.t.	n.t.	n.t.	n.t.	0/1							n.t.	n.t.	n.t.	n.t.	n.t.	n.t.	n.t.	0/0						n.t.	n.t.
MP03-I	1	1	1	tooth, 55/65	neg	n.t.	n.t.	n.t.	n.t.	n.t.	n.t.	neg	neg	n.t.	n.t.	neg	n.t.	n.t.	n.t.	n.t.	n.t.	n.t.	n.t.	0/4		neg	n.t.	neg	neg	n.t.	n.t.	n.t.	n.t.	n.t.	n.t.	n.t.	n.t.	0/3		n.t.	n.t.	n. t.	n. t.	n.t.	n.t.
			2		n.t.	neg	n.t.	n.t.	n.t.	n.t.	n.t.	n.t.	n.t.	n.t.	n.t.	n.t.	n.t.	n.t.	n.t.	n.t.	n.t.	n.t.	n.t.	0/1		n.t.	n.t.	n.t.	n.t.	n.t.	n.t.	n.t.	n.t.	n.t.	n.t.	n.t.	n.t.	0/0		n.t.	n.t.	n. t.	n. t.	n.t.	n.t.
MP10-I	1	1	1	tooth, 37	neg	n.t.	n.t.	n.t.	n.t.	n.t.	n.t.	neg	n.t.	neg	n.t.	neg	n.t.	n.t.	n.t.	n.t.	n.t.	n.t.	n.t.	0/4		neg	n.t.	n.t.	n.t.	neg	n.t.	n.t.	n.t.	n.t.	n.t.	neg	n.t.	0/3		32.82	n.t.	n. t.	n. t.	n.t.	n.t.
			2		n.t.	neg	n.t.	n.t.	n.t.	n.t.	n.t.	n.t.	n.t.	n.t.	n.t.	n.t.	n.t.	n.t.	n.t.	n.t.	n.t.	n.t.	n.t.	0/1		n.t.	n.t.	n.t.	n.t.	n.t.	n.t.	n.t.	n.t.	n.t.	n.t.	n.t.	n.t.	0/0		n.t.	n.t.	n. t.	n. t.	n.t.	n.t.
MP17-I	1	1	1	tooth, 36	27.54	n.t.	n.t.	n.t.	n.t.	n.t.	26.64	n.t.	n.t.	n.t.	n.t.	27.67	n.t.	27.57	n.t.	n.t.	n.t.	n.t.	n.t.	4/4		pos	pos	n.t.	n.t.	n.t.	pos	n.t.	n.t.	n.t.	n.t.	n.t.	n.t.	3/3		n.t.	n.t.	n. t.	n. t.	n.t.	n.t.
			2		n.t.	30.81	n.t.	n.t.	n.t.	n.t.	n.t.	n.t.	n.t.	n.t.	n.t.	n.t.	n.t.	n.t.	n.t.	n.t.	n.t.	n.t.	n.t.	1/1		n.t.	pos	n.t.	n.t.	n.t.	n.t.	n.t.	n.t.	n.t.	n.t.	n.t.	n.t.	1/1		n.t.	n.t.	n. t.	n. t.	n.t.	n.t.
	2	1	1					33.72	32.07	n.t., no more DNA since eluates were pooled												n.t.	n.t.	2/2		n.t.	n.t.	n.t., no more DNA since elaues were pooled										0/0		n.t.	n.t.	n. t.	n. t.	n.t.	n.t.
			2					32.69	33.61													n.t.	n.t.	2/2		n.t.	n.t.											0/0		n.t.	n.t.	n. t.	n. t.	n.t.	n.t.
			3						33.49	n.t.	n.t.	n.t.	n.t.	n.t.	n.t.	n.t.	n.t.	n.t.	n.t.	n.t.	n.t.	n.t.	n.t.	1/1		n.t.	n.t.	n.t.	n.t.	n.t.	n.t.	n.t.	n.t.	n.t.	n.t.	n.t.	n.t.	0/0		n.t.	n.t.	n. t.	n. t.	n.t.	n.t.
			1+2						31.99	n.t.	n.t.	n.t.	n.t.	n.t.	n.t.	n.t.	n.t.	n.t.	n.t.	n.t.	n.t.	n.t.	n.t.	1/1		n.t.	n.t.	pos	n.t.	n.t.	n.t.	n.t.	n.t.	n.t.	n.t.	n.t.	n.t.	1/1		n.t.	n.t.	n. t.	n. t.	n.t.	n.t.
	2	2	1							32.28	neg	n.t.	n.t.	n.t.	n.t.	n.t.	n.t.	n.t.	n.t.	n.t.	n.t.	n.t.	n.t.	1/2		n.t.	n.t.	pos	n.t.	n.t.	n.t.	n.t.	n.t.	n.t.	n.t.	n.t.	n.t.	1/1		n.t.	n.t.	n. t.	n. t.	n.t.	n.t.
			2		n.t., extracts did not exist					33.62	33.16	n.t.	n.t.	n.t.	n.t.	n.t.	n.t.	n.t.	n.t.	n.t.	n.t.	n.t.	n.t.	2/2		n.t.	n.t.	n.t.	n.t.	n.t.	n.t.	n.t.	n.t.	n.t.	n.t.	n.t.	n.t.	0/0		n.t.	n.t.	n. t.	n. t.	n.t.	n.t.
	3	1	1											28.84	n.t.	n.t.	n.t.	n.t.	n.t.	n.t.	n.t.	n.t.	n.t.	1/1		n.t.	n.t.	n.t.	n.t.	n.t.	n.t.	n.t.	n.t.	n.t.	n.t.	n.t.	n.t.	0/0		n.t., extracts did not exist				n.t.	n.t.
			2											30.73	n.t.	n.t.	n.t.	n.t.	n.t.	n.t.	n.t.	n.t.	n.t.	1/1		n.t.	n.t.	n.t.	n.t.	n.t.	n.t.	n.t.	n.t.	n.t.	n.t.	n.t.	n.t.	0/0						n.t.	n.t.
MP19-II	1	1	1	tooth, 75	27.64	n.t.	n.t.	n.t.	n.t.	27.98	n.t.	n.t.	26.84	n.t.	n.t.	27.95	n.t.	n.t.	n.t.	n.t.	n.t.	n.t.	n.t.	4/4		pos	pos	pos	n.t.	n.t.	n.t.	n.t.	n.t.	n.t.	n.t.	n.t.	n.t.	3/3		n.t.	n.t.	n.t.	n.t.	n.t.	n.t.
			2		n.t.	33.28	n.t.	n.t.	n.t.	n.t.	n.t.	n.t.	n.t.	n.t.	n.t.	n.t.	n.t.	n.t.	n.t.	n.t.	n.t.	n.t.	n.t.	1/1		n.t.	n.t.	pos	n.t.	n.t.	n.t.	n.t.	n.t.	n.t.	n.t.	n.t.	n.t.	1/2		n.t.	n.t.	n.t.	n.t.	n.t.	n.t.
MP22	1	1	1	tooth, 26	neg	n.t.	n.t.	n.t.	n.t.	n.t.	n.t.	neg	neg	n.t.	n.t.	neg	n.t.	n.t.	n.t.	n.t.	n.t.	n.t.	n.t.	0/4		neg	n.t.	neg	n.t.	neg	n.t.	n.t.	n.t.	n.t.	n.t.	n.t.	n.t.	0/3		38.08	n.t.	n.t.	n.t.	n.t.	n.t.
			2		n.t.	neg	n.t.	n.t.	n.t.	n.t.	n.t.	n.t.	n.t.	n.t.	n.t.	n.t.	n.t.	n.t.	n.t.	n.t.	n.t.	n.t.	n.t.	0/1		n.t.	n.t.	n.t.	n.t.	n.t.	n.t.	n.t.	n.t.	n.t.	n.t.	n.t.	n.t.	0/0		n.t.	n.t.	n.t.	n.t.	n.t.	n.t.
MP26-I	1	1	1	tooth, 26	neg	n.t.	n.t.	n.t.	n.t.	n.t.	n.t.	neg	neg	neg	n.t.	n.t.	n.t.	n.t.	n.t.	n.t.	n.t.	n.t.	n.t.	0/4		neg	n.t.	neg	n.t.	neg	n.t.	n.t.	n.t.	n.t.	n.t.	n.t.	n.t.	0/3		32.04	n.t.	n.t.	n.t.	n.t.	n.t.
			2		n.t.	neg	n.t.	n.t.	n.t.	n.t.	n.t.	n.t.	n.t.	n.t.	n.t.	n.t.	n.t.	n.t.	n.t.	n.t.	n.t.	n.t.	n.t.	0/1		n.t.	n.t.	n.t.	n.t.	n.t.	n.t.	n.t.	n.t.	n.t.	n.t.	n.t.	n.t.	0/0		n.t.	n.t.	n.t.	n.t.	n.t.	n.t.
	2	1	1					neg	n.t.	n.t.	n.t.	n.t.	neg	n.t.	n.t.	n.t.	n.t.	n.t.	n.t.	n.t.	n.t.	n.t.	n.t.	0/2		n.t.	n.t.	n.t.	n.t.	n.t.	n.t.	n.t.	n.t.	n.t.	n.t.	n.t.	n.t.	0/0		n.t., extracts did not exist				n.t.	n.t.
			2					neg	n.t.	n.t.	n.t.	n.t.	n.t.	n.t.	n.t.	n.t.	n.t.	n.t.	n.t.	n.t.	n.t.	n.t.	n.t.	0/1		n.t.	n.t.	n.t.	n.t.	n.t.	n.t.	n.t.	n.t.	n.t.	n.t.	n.t.	n.t.	0/0						n.t.	n.t.
	3	1	1		n.t., extracts did not exist									neg	n.t.	n.t.	n.t.	n.t.	n.t.	n.t.	n.t.	n.t.	n.t.	0/1		n.t.	n.t.	n.t.	n.t.	n.t.	n.t.	n.t.	n.t.	n.t.	n.t.	n.t.	n.t.	0/0						neg	34.72
			2											neg	n.t.	n.t.	n.t.	n.t.	n.t.	n.t.	n.t.	n.t.	n.t.	0/1		n.t.	n.t.	n.t.	n.t.	n.t.	n.t.	n.t.	n.t.	n.t.	n.t.	n.t.	n.t.	0/0						n.t.	n.t.
MP34-I	1	1	1	humerus	neg	n.t.	n.t.	n.t.	n.t.	n.t.	neg	neg	neg	n.t.	n.t.	n.t.	n.t.	n.t.	n.t.	n.t.	n.t.	n.t.	n.t.	0/4		neg	n.t.	neg	neg	n.t.	n.t.	n.t.	n.t.	n.t.	n.t.	n.t.	n.t.	0/3		34.71	n.t.	n.t.	n.t.	n.t.	n.t.
			2		n.t.	neg	n.t.	n.t.	n.t.	n.t.	n.t.	n.t.	n.t.	n.t.	n.t.	n.t.	n.t.	n.t.	n.t.	n.t.	n.t.	n.t.	n.t.	0/1		n.t.	n.t.	n.t.	n.t.	n.t.	n.t.	n.t.	n.t.	n.t.	n.t.	n.t.	n.t.	0/0		n.t.	n.t.	n.t.	n.t.	n.t.	n.t.
MP54-VI	1	1	1	tooth, 46	neg	n.t.	n.t.	n.t.	n.t.	n.t.	n.t.	neg	neg	n.t.	n.t.	neg	n.t.	n.t.	n.t.	n.t.	n.t.	n.t.	n.t.	0/4		neg	n.t.	neg	neg	n.t.	n.t.	n.t.	n.t.	n.t.	n.t.	n.t.	n.t.	0/3		neg	31.77	n.t.	n.t.	n.t.	n.t.
			2		n.t.	neg	n.t.	n.t.	n.t.	n.t.	n.t.	n.t.	n.t.	n.t.	n.t.	n.t.	n.t.	n.t.	n.t.	n.t.	n.t.	n.t.	n.t.	0/1		n.t.	n.t.	n.t.	n.t.	n.t.	n.t.	n.t.	n.t.	n.t.	n.t.	n.t.	n.t.	0/0		n.t.	n.t.	n.t.	n.t.	n.t.	n.t.
MP56-II	1	1	1	tooth, 37	neg	n.t.	n.t.	n.t.	n.t.	n.t.	n.t.	neg	neg	n.t.	n.t.	neg	n.t.	n.t.	n.t.	n.t.	n.t.	n.t.	n.t.	0/4		neg	n.t.	neg	n.t.	neg	n.t.	n.t.	n.t.	n.t.	n.t.	n.t.	n.t.	0/3		35.32	n.t.	n.t.	n.t.	n.t.	n.t.
			2		n.t.	neg	n.t.	n.t.	n.t.	n.t.	n.t.	n.t.	n.t.	n.t.	n.t.	n.t.	n.t.	n.t.	n.t.	n.t.	n.t.	n.t.	n.t.	0/1		n.t.	n.t.	n.t.	n.t.	n.t.	n.t.	n.t.	n.t.	n.t.	n.t.	n.t.	n.t.	0/0		n.t.	n.t.	n.t.	n.t.	n.t.	n.t.
MP59-I	1	1	1	tooth, 16	32.07	n.t.	n.t.	n.t.	n.t.	32.33	n.t.	n.t.	31.32	n.t.	n.t.	32.54	n.t.	n.t.	n.t.	n.t.	n.t.	n.t.	n.t.	4/4		pos	n.t.	pos	n.t.	pos	n.t.	n.t.	n.t.	n.t.	n.t.	n.t.	n.t.	3/3		n.t.	n.t.	n.t.	n.t.	n.t.	n.t.
			2		n.t.	36.84	n.t.	n.t.	n.t.	n.t.	n.t.	n.t.	n.t.	n.t.	n.t.	n.t.	n.t.	n.t.	n.t.	n.t.	n.t.	n.t.	n.t.	1/1		n.t.	n.t.	neg	n.t.	n.t.	n.t.	n.t.	n.t.	n.t.	n.t.	n.t.	n.t.	0/1		n.t.	n.t.	n.t.	n.t.	n.t.	n.t.
	2	1	1					neg	n.t.	n.t.	n.t.	n.t.	n.t.	n.t.	n.t.	n.t.	n.t.	n.t.	n.t.	n.t.	n.t.	n.t.	n.t.	0/1		n.t.	n.t.	n.t.	n.t.	n.t.	n.t.	n.t.	n.t.	n.t.	n.t.	n.t.	n.t.	0/0		n.t., extracts did not exist				neg	34.17
			2					neg	n.t.	n.t.	n.t.	n.t.	n.t.	n.t.	n.t.	n.t.	n.t.	n.t.	n.t.	n.t.	n.t.	n.t.	n.t.	0/1		n.t.	n.t.	n.t.	n.t.	n.t.	n.t.	n.t.	n.t.	n.t.	n.t.	n.t.	n.t.	0/0						n.t.	n.t.
	3	1	1		n.t., extracts did not exist									35.8	n.t.	n.t.	n.t.	n.t.	n.t.	n.t.	n.t.	n.t.	n.t.	1/1		n.t.	n.t.	n.t.	pos	n.t.	n.t.	n.t.	n.t.	n.t.	n.t.	n.t.	n.t.	1/1						n.t.	n.t.
			2											38.11	n.t.	n.t.	n.t.	n.t.	n.t.	n.t.	n.t.	n.t.	n.t.	1/1		n.t.	n.t.	n.t.	n.t.	n.t.	n.t.	n.t.	n.t.	n.t.	n.t.	n.t.	n.t.	0/0						n.t.	n.t.
MP73-I	1	1	1	tooth, 18	neg	n.t.	n.t.	n.t.	n.t.	n.t.	n.t.	neg	neg	n.t.	n.t.	neg	n.t.	n.t.	n.t.	n.t.	n.t.	n.t.	n.t.	0/4		neg	n.t.	n.t.	n.t.	neg	neg	n.t.	n.t.	n.t.	n.t.	n.t.	n.t.	0/3		32.97	n.t.	n.t.	n.t.	n.t.	n.t.
			2		n.t.	neg	n.t.	n.t.	n.t.	n.t.	n.t.	n.t.	n.t.	n.t.	n.t.	n.t.	n.t.	n.t.	n.t.	n.t.	n.t.	n.t.	n.t.	0/1		n.t.	n.t.	n.t.	n.t.	n.t.	n.t.	n.t.	n.t.	n.t.	n.t.	n.t.	n.t.	0/0		n.t.	n.t.	n.t.	n.t.	n.t.	n.t.
MPS01-I	1	1	1	tooth, 36	37.34	n.t.	n.t.	n.t., nor more DNA																1/1		neg	n.t.	n.t., no more DNA										0/1		n.t.	n.t.	n.t.	n.t.	n.t.	n.t.
			2		n.t.	neg	n.t.	n.t.	n.t.	n.t.	n.t.	n.t.	neg	n.t.	n.t.	n.t.	n.t.	n.t.	n.t.	n.t.	n.t.	n.t.	n.t.	0/2		n.t.	n.t.	neg	pos	n.t.	n.t.	n.t.	n.t.	n.t.	n.t.	n.t.	n.t.	1/2		n.t.	n.t.	n.t.	n.t.	n.t.	n.t.
	2	1	1					>40	38.76	n.t., no more DNA since eluates were pooled														2/2		n.t.	n.t.	n.t., no more DNA since eluates were pooled										0/0						n.t.	n.t.
			2					37.92	neg															1/2		n.t.	n.t.											0/0						n.t.	n.t.
			3						neg	n.t.	n.t.	n.t.	n.t.	n.t.	n.t.	n.t.	n.t.	n.t.	n.t.	n.t.	n.t.	n.t.	n.t.	0/1		n.t.	n.t.	n.t.	n.t.	n.t.	n.t.	n.t.	n.t.	n.t.	n.t.	n.t.	n.t.	0/0						n.t.	n.t.
			1+2						neg	n.t.	n.t.	n.t.	n.t.	n.t.	n.t.	n.t.	n.t.	n.t.	n.t.	n.t.	n.t.	n.t.	n.t.	0/1		n.t.	n.t.	n.t.	n.t.	n.t.	n.t.	n.t.	n.t.	n.t.	n.t.	n.t.	n.t.	0/0						35.08	n.t.
	2	2	1							>40	neg	n.t.	n.t.	n.t.	n.t.	n.t.	n.t.	n.t.	n.t.	n.t.	n.t.	n.t.	n.t.	1/2		n.t.	n.t.	n.t.	neg	n.t.	n.t.	n.t.	n.t.	n.t.	n.t.	n.t.	n.t.	0/1		n.t., extracts did not exist				n.t.	n.t.
			2							neg	neg	n.t.	n.t.	n.t.	n.t.	n.t.	n.t.	n.t.	n.t.	n.t.	n.t.	n.t.	n.t.	0/2		n.t.	n.t.	n.t.	n.t.	n.t.	n.t.	n.t.	n.t.	n.t.	n.t.	n.t.	n.t.	0/0						n.t.	n.t.
	3	1	1											36.52	n.t.	n.t.	n.t.	n.t.	n.t.	n.t.	n.t.	n.t.	n.t.	1/1		n.t.	n.t.	n.t.	neg	n.t.	n.t.	n.t.	n.t.	n.t.	n.t.	n.t.	n.t.	0/1						n.t.	n.t.
			2		n.t., extracts did not exist									neg	n.t.	n.t.	n.t.	n.t.	n.t.	n.t.	n.t.	n.t.	n.t.	0/1		n.t.	n.t.	n.t.	n.t.	n.t.	n.t.	n.t.	n.t.	n.t.	n.t.	n.t.	n.t.	0/0						n.t.	n.t.
	1	1	1																	35.97	35.34	36.23	35.83	4/4		n.t., extracts did not exist								neg	pos	neg	n.t.	1/3
			2																	n.t.	n.t.	neg	n.t.	0/1										n.t.	n.t.	n.t.	n.t.	0/0
MPS03-IIX	1	1	1	tooth, 16	neg	n.t.	n.t.	n.t.	n.t.	n.t.	n.t.	neg	neg	n.t.	n.t.	neg	n.t.	n.t.	n.t.	n.t.	n.t.	n.t.	n.t.	0/4		neg	n.t.	neg	n.t.	neg	n.t.	n.t.	n.t.	n.t.	n.t.	n.t.	n.t.	0/3		neg	32.24	n.t.	n.t.	n.t.	n.t.
			2		n.t.	neg	n.t.	n.t.	n.t.	n.t.	n.t.	n.t.	n.t.	n.t.	n.t.	n.t.	n.t.	n.t.	n.t.	n.t.	n.t.	n.t.	n.t.	0/1		n.t.	n.t.	n.t.	n.t.	n.t.	n.t.	n.t.	n.t.	n.t.	n.t.	n.t.	n.t.	0/0		n.t.	n.t.	n.t.	n.t.	n.t.	n.t.
MPS04-VI	1	1	1	tooth, Inc.	neg	n.t.	n.t.	n.t.	n.t.	n.t.	n.t.	neg	neg	n.t.	n.t.	neg	n.t.	n.t.	n.t.	n.t.	n.t.	n.t.	n.t.	0/4		neg	n.t.	neg	n.t.	neg	n.t.	n.t.	n.t.	n.t.	n.t.	n.t.	n.t.	0/3		neg	32.21	n.t.	n.t.	n.t.	n.t.
			2		n.t.	neg	n.t.	n.t.	n.t.	n.t.	n.t.	n.t.	n.t.	n.t.	n.t.	n.t.	n.t.	n.t.	n.t.	n.t.	n.t.	n.t.	n.t.	0/1		n.t.	n.t.	n.t.	n.t.	n.t.	n.t.	n.t.	n.t.	n.t.	n.t.	n.t.	n.t.	0/0		n.t.	n.t.	n.t.	n.t.	n.t.	n.t.
MPS08-XXXI	1	1	1	tooth, 16	neg	n.t.	n.t.	n.t.	n.t.	n.t.	n.t.	neg	neg	n.t.	n.t.	neg	n.t.	n.t.	n.t.	n.t.	n.t.	n.t.	n.t.	0/4		neg	n.t.	neg	n.t.	neg	n.t.	n.t.	n.t.	n.t.	n.t.	n.t.	n.t.	0/3		38.55	n.t.	n.t.	n.t.	n.t.	n.t.
			2		n.t.	neg	n.t.	n.t.	n.t.	n.t.	n.t.	n.t.	n.t.	n.t.	n.t.	n.t.	n.t.	n.t.	n.t.	n.t.	n.t.	n.t.	n.t.	0/1		n.t.	n.t.	n.t.	n.t.	neg	n.t.	n.t.	n.t.	n.t.	n.t.	n.t.	n.t.	0/1		n.t.	n.t.	n.t.	n.t.	n.t.	n.t.
MPS09-II	1	1	1	tooth, 33	neg	n.t.	n.t.	n.t.	n.t.	n.t.	n.t.	neg	neg	n.t.	n.t.	neg	n.t.	n.t.	n.t.	n.t.	n.t.	n.t.	n.t.	0/4		neg	n.t.	neg	n.t.	neg	n.t.	n.t.	n.t.	n.t.	n.t.	n.t.	n.t.	0/3		35.02	n.t.	n.t.	n.t.	n.t.	n.t.
			2		n.t.	neg	n.t.	n.t.	n.t.	n.t.	n.t.	n.t.	n.t.	n.t.	n.t.	n.t.	n.t.	n.t.	n.t.	n.t.	n.t.	n.t.	n.t.	0/1		n.t.	n.t.	n.t.	n.t.	n.t.	n.t.	n.t.	n.t.	n.t.	n.t.	n.t.	n.t.	0/0		n.t.	n.t.	n.t.	n.t.	n.t.	n.t.
MPS09-VI	1	1	1	tooth, 46	neg	n.t.	n.t.	n.t.	n.t.	n.t.	n.t.	neg	neg	n.t.	n.t.	neg	n.t.	n.t.	n.t.	n.t.	n.t.	n.t.	n.t.	0/4		neg	n.t.	neg	n.t.	neg	n.t.	n.t.	n.t.	n.t.	n.t.	n.t.	n.t.	0/3		> 40	n.t.	n.t.	n.t.	n.t.	n.t.
			2		n.t.	neg	n.t.	n.t.	n.t.	n.t.	n.t.	n.t.	n.t.	n.t.	n.t.	n.t.	n.t.	n.t.	n.t.	n.t.	n.t.	n.t.	n.t.	0/1		n.t.	n.t.	n.t.	n.t.	n.t.	n.t.	n.t.	n.t.	n.t.	n.t.	n.t.	n.t.	0/0		n.t.	n.t.	n.t.	n.t.	n.t.	n.t.
MPS12-I	1	1	1	tooth, 16	neg	n.t.	n.t.	n.t.	n.t.	neg	n.t.	n.t.	neg	n.t.	n.t.	neg	n.t.	n.t.	n.t.	n.t.	n.t.	n.t.	n.t.	0/4		neg	n.t.	neg	n.t.	neg	n.t.	n.t.	n.t.	n.t.	n.t.	n.t.	n.t.	0/3		neg	n.t.	n.t.	n.t.	n.t.	n.t.
			2		n.t.	neg	n.t.	n.t.	n.t.	n.t.	n.t.	n.t.	n.t.	n.t.	n.t.	n.t.	n.t.	n.t.	n.t.	n.t.	n.t.	n.t.	n.t.	0/1		n.t.	n.t.	n.t.	n.t.	n.t.	n.t.	n.t.	n.t.	n.t.	n.t.	n.t.	n.t.	0/0		n.t.	n.t.	n.t.	n.t.	n.t.	n.t.
MPS15-V	1	1	1	tooth, 26	neg	n.t.	n.t.	n.t.	n.t.	n.t.	n.t.	neg	neg	n.t.	n.t.	neg	n.t.	n.t.	n.t.	n.t.	n.t.	n.t.	n.t.	0/4		neg	n.t.	neg	neg	n.t.	n.t.	n.t.	n.t.	n.t.	n.t.	n.t.	n.t.	0/3		neg	31.89	n.t.	n.t.	n.t.	n.t.
			2		n.t.	neg	n.t.	n.t.	n.t.	n.t.	n.t.	n.t.	n.t.	n.t.	n.t.	n.t.	n.t.	n.t.	n.t.	n.t.	n.t.	n.t.	n.t.	0/1		n.t.	n.t.	n.t.	n.t.	n.t.	n.t.	n.t.	n.t.	n.t.	n.t.	n.t.	n.t.	0/0		n.t.	n.t.	n.t.	n.t.	n.t.	n.t.
MPS15-VII	1	1	1	tooth, Caninus	neg	n.t.	n.t.	n.t.	n.t.	n.t.	n.t.	neg	neg	n.t.	n.t.	neg	n.t.	n.t.	n.t.	n.t.	n.t.	n.t.	n.t.	0/4		neg	n.t.	neg	n.t.	neg	n.t.	n.t.	n.t.	n.t.	n.t.	n.t.	n.t.	0/3		neg	32.7	n.t.	n.t.	n.t.	n.t.
			2		n.t.	neg	n.t.	n.t.	n.t.	n.t.	n.t.	n.t.	n.t.	n.t.	n.t.	n.t.	n.t.	n.t.	n.t.	n.t.	n.t.	n.t.	n.t.	0/1		n.t.	n.t.	n.t.	n.t.	n.t.	n.t.	n.t.	n.t.	n.t.	n.t.	n.t.	n.t.	0/0		n.t.	n.t.	n.t.	n.t.	n.t.	n.t.
E1	1	1	1		neg	n.t.	n.t.	n.t.	n.t.	n.t.	n.t.	n.t.	n.t.	neg	n.t.	n.t.	n.t.	neg	n.t.	neg	n.t.	n.t.	n.t.	0/4		neg	n.t.	neg	n.t.	neg	n.t.	n.t.		n.t.	n.t.	n.t.	n.t.	0/3		n.t.	n.t.	n.t.	n.t.	neg	34.5
			2		n.t.	neg	n.t.	n.t.	n.t.	n.t.	n.t.	n.t.	n.t.	n.t.	n.t.	n.t.	n.t.	n.t.	n.t.	n.t.	n.t.	n.t.	n.t.	0/1		n.t.	n.t.	n.t.	n.t.	n.t.	n.t.	n.t.		n.t.	n.t.	n.t.	n.t.	0/0		n.t.	n.t.	n.t.	n.t.	n.t.	n.t.
E2	1	1	1		neg	n.t.	n.t.	n.t.	n.t.	n.t.	n.t.	n.t.	n.t.	neg	n.t.	n.t.	n.t.	neg	n.t.	neg	n.t.	n.t.	n.t.	0/4		neg	n.t.	neg	n.t.	neg	n.t.	n.t.		n.t.	n.t.	n.t.	n.t.	0/3		n.t.	n.t.	n.t.	n.t.	neg	34.22
			2		n.t.	neg	n.t.	n.t.	n.t.	n.t.	n.t.	n.t.	n.t.	n.t.	n.t.	n.t.	n.t.	n.t.	n.t.	n.t.	n.t.	n.t.	n.t.	0/1		n.t.	n.t.	n.t.	n.t.	n.t.	n.t.	n.t.		n.t.	n.t.	n.t.	n.t.	0/0		n.t.	n.t.	n.t.	n.t.	n.t.	n.t.
E3	1	1	1		neg	n.t.	n.t.	n.t.	n.t.	n.t.	n.t.	n.t.	n.t.	neg	n.t.	n.t.	n.t.	neg	n.t.	neg	n.t.	n.t.	n.t.	0/4		neg	n.t.	neg	n.t.	neg	n.t.	n.t.		n.t.	n.t.	n.t.	n.t.	0/3		n.t.	n.t.	n.t.	n.t.	neg	34.61
			2		n.t.	neg	n.t.	n.t.	n.t.	n.t.	n.t.	n.t.	n.t.	n.t.	n.t.	n.t.	n.t.	n.t.	n.t.	n.t.	n.t.	n.t.	n.t.	0/1		n.t.	n.t.	n.t.	n.t.	n.t.	n.t.	n.t.		n.t.	n.t.	n.t.	n.t.	0/0		n.t.	n.t.	n.t.	n.t.	n.t.	n.t.
E4	1	1	1		neg	n.t.	n.t.	n.t.	n.t.	n.t.	n.t.	n.t.	n.t.	neg	n.t.	n.t.	n.t.	neg	n.t.	neg	n.t.	n.t.	n.t.	0/4		neg	n.t.	neg	n.t.	neg	n.t.	n.t.		n.t.	n.t.	n.t.	n.t.	0/3		n.t.	n.t.	n.t.	n.t.	neg	33.38
			2		n.t.	neg	n.t.	n.t.	n.t.	n.t.	n.t.	n.t.	n.t.	n.t.	n.t.	n.t.	n.t.	n.t.	n.t.	n.t.	n.t.	n.t.	n.t.	0/1		n.t.	n.t.	n.t.	n.t.	n.t.	n.t.	n.t.		n.t.	n.t.	n.t.	n.t.	0/0		n.t.	n.t.	n.t.	n.t.	n.t.	n.t.
E5	1	1	1		neg	n.t.	n.t.	n.t.	n.t.	n.t.	n.t.	n.t.	n.t.	neg	n.t.	n.t.	n.t.	neg	n.t.	neg	n.t.	n.t.	n.t.	0/4		neg	n.t.	neg	n.t.	neg	n.t.	n.t.		n.t.	n.t.	n.t.	n.t.	0/3		n.t.	n.t.	n.t.	n.t.	neg	34.82
			2		n.t.	neg	n.t.	n.t.	n.t.	n.t.	n.t.	n.t.	n.t.	n.t.	n.t.	n.t.	n.t.	n.t.	n.t.	n.t.	n.t.	n.t.	n.t.	0/1		n.t.	n.t.	n.t.	n.t.	n.t.	n.t.	n.t.		n.t.	n.t.	n.t.	n.t.	0/0		n.t.	n.t.	n.t.	n.t.	n.t.	n.t.
E6	1	1	1		neg	n.t.	n.t.	n.t.	n.t.	n.t.	n.t.	n.t.	n.t.	neg	n.t.	n.t.	n.t.	neg	n.t.	neg	n.t.	n.t.	n.t.	0/4		neg	n.t.	neg	n.t.	neg	n.t.	n.t.		n.t.	n.t.	n.t.	n.t.	0/3		n.t.	n.t.	n.t.	n.t.	neg	33.73
E7	1	1	1		neg	n.t.	n.t.	n.t.	n.t.	n.t.	n.t.	n.t.	n.t.	neg	n.t.	n.t.	n.t.	neg	n.t.	neg	n.t.	n.t.	n.t.	0/4		neg	n.t.	neg	n.t.	neg	n.t.	n.t.		n.t.	n.t.	n.t.	n.t.	0/3		n.t.	n.t.	n.t.	n.t.	neg	34.2
			2		n.t.	neg	n.t.	n.t.	n.t.	n.t.	n.t.	n.t.	n.t.	n.t.	n.t.	n.t.	n.t.	n.t.	n.t.	n.t.	n.t.	n.t.	n.t.	0/1		n.t.	n.t.	n.t.	n.t.	n.t.	n.t.	n.t.		n.t.	n.t.	n.t.	n.t.	0/0		n.t.	n.t.	n.t.	n.t.	n.t.	n.t.
E8	1	1	1		n.t.	n.t.	n.t.	n.t.	n.t.	n.t.	n.t.	n.t.	n.t.	neg	n.t.	n.t.	n.t.	neg	n.t.	neg	n.t.	neg	n.t.	0/4		n.t.	n.t.	neg	n.t.	neg	n.t.	n.t.		neg	n.t.	n.t.	n.t.	0/3		n.t.	n.t.	n.t.	n.t.	neg	35.25
			2		n.t.	n.t.	n.t.	n.t.	n.t.	n.t.	n.t.	n.t.	n.t.	n.t.	n.t.	n.t.	n.t.	n.t.	n.t.	n.t.	n.t.	n.t.	n.t.	0/1		n.t.	n.t.	n.t.	n.t.	n.t.	n.t.	n.t.		n.t.	n.t.	n.t.	n.t.	0/0		n.t.	n.t.	n.t.	n.t.	n.t.	n.t.
E9	2	1	1		n.t.	n.t.	n.t.	n.t.	n.t.	n.t.	n.t.	n.t.	n.t.	neg	n.t.	n.t.	n.t.	neg	n.t.	neg	n.t.	neg	n.t.	0/4		n.t.	n.t.	neg	n.t.	neg	n.t.	n.t.		neg	n.t.	n.t.	n.t.	0/3		n.t.	n.t.	n.t.	n.t.	neg	33.73
			2		n.t.	n.t.	n.t.	n.t.	n.t.	n.t.	n.t.	n.t.	n.t.	n.t.	n.t.	n.t.	n.t.	n.t.	n.t.	n.t.	n.t.	n.t.	n.t.	0/1		n.t.	n.t.	n.t.	n.t.	n.t.	n.t.	n.t.		n.t.	n.t.	n.t.	n.t.	0/0		n.t.	n.t.	n.t.	n.t.	n.t.	n.t.
E10	2	1	1		n.t.	n.t.	n.t.	n.t.	n.t.	n.t.	n.t.	n.t.	n.t.	neg	n.t.	n.t.	n.t.	neg	n.t.	neg	n.t.	neg	n.t.	0/4		n.t.	n.t.	neg	n.t.	neg	n.t.	n.t.		neg	n.t.	n.t.	n.t.	0/3		n.t.	n.t.	n.t.	n.t.	neg	34.87
			2		n.t.	n.t.	n.t.	n.t.	n.t.	n.t.	n.t.	n.t.	n.t.	n.t.	n.t.	n.t.	n.t.	n.t.	n.t.	n.t.	n.t.	n.t.	n.t.	0/1		n.t.	n.t.	n.t.	n.t.	n.t.	n.t.	n.t.		n.t.	n.t.	n.t.	n.t.	0/0		n.t.	n.t.	n.t.	n.t.	n.t.	n.t.
E11	3	1	1		n.t.	n.t.	n.t.	n.t.	n.t.	n.t.	n.t.	n.t.	n.t.	neg	n.t.	n.t.	n.t.	neg	n.t.	neg	n.t.	neg	n.t.	0/4		n.t.	n.t.	n.t.	n.t.	neg	n.t.	n.t.		neg	neg	n.t.	n.t.	0/3		n.t.	n.t.	n.t.	n.t.	neg	33.85
			2		n.t.	n.t.	n.t.	n.t.	n.t.	n.t.	n.t.	n.t.	n.t.	neg	n.t.	n.t.	n.t.	n.t.	n.t.	n.t.	n.t.	n.t.	n.t.	0/1		n.t.	n.t.	n.t.	n.t.	n.t.	n.t.	n.t.		n.t.	n.t.	n.t.	n.t.	0/0		n.t.	n.t.	n.t.	n.t.	n.t.	n.t.
E12	1	1	1		n.t. , extracts did not exist										neg	n.t.	n.t.	neg	n.t.	neg	n.t.	neg	n.t.	0/4		n.t.	n.t.	n.t.	n.t.	neg	n.t.	n.t.		neg	neg	n.t.	n.t.	0/3		n.t.	n.t.	n.t.	n.t.	neg	34.76
			2												n.t.	n.t.	n.t.	n.t.	n.t.	n.t.	n.t.	neg	n.t.	0/1		n.t.	n.t.	n.t.	n.t.	n.t.	n.t.	n.t.		n.t.	n.t.	n.t.	n.t.	0/0		n.t.	n.t.	n.t.	n.t.	n.t.	n.t.
E13	1	1	1																	neg	neg	neg	neg	0/4		n.t., extracts did not exist								neg	neg	neg	n.t.	0/3		n.t., extracts did not exist
			2																	n.t.	n.t.	neg	n.t.	0/1										n.t.	n.t.	n.t.	n.t.	0/0
Ba04	1	1	1	tooth, 45		n.t.	neg	n.t.	n.t.	n.t.	n.t.	n.t.	neg	n.t.	n.t.	n.t.	n.t.	neg	n.t.	neg	n.t.	n.t.	n.t.	0/4		n.t.	n.t.	neg	n.t.	n.t.	n.t.	n.t.		neg	neg	n.t.	n.t.	0/3		n.t.	n.t.	34.22	31.75	n.t.	n.t.
Ba40	1	1	1	tooth, 34		n.t.	neg	n.t.	n.t.	n.t.	n.t.	n.t.	neg	n.t.	n.t.	n.t.	n.t.	neg	n.t.	neg	n.t.	n.t.	n.t.	0/4		n.t.	n.t.	neg	n.t.	n.t.	n.t.	n.t.		neg	neg	n.t.	n.t.	0/3		n.t.	n.t.	37.04	32.95	n.t.	n.t.
Ba27	1	1	1	tooth, 35		n.t.	neg	n.t.	n.t.	n.t.	n.t.	n.t.	neg	n.t.	n.t.	n.t.	n.t.	neg	n.t.	neg	n.t.	n.t.	n.t.	0/4		n.t.	n.t.	neg	n.t.	n.t.	n.t.	n.t.		neg	neg	n.t.	n.t.	0/3		n.t.	n.t.	32.97	31.6	n.t.	n.t.
Ba10	1	1	1	tooth, 45		n.t.	neg	n.t.	n.t.	n.t.	n.t.	n.t.	neg	n.t.	n.t.	n.t.	n.t.	neg	n.t.	neg	n.t.	n.t.	n.t.	0/4		n.t.	n.t.	neg	n.t.	n.t.	n.t.	n.t.		neg	neg	n.t.	n.t.	0/3		n.t.	n.t.	neg	32.7	n.t.	n.t.
Ba21	1	1	1	tooth, 35		n.t.	neg	n.t.	n.t.	n.t.	n.t.	n.t.	neg	n.t.	n.t.	n.t.	n.t.	neg	n.t.	neg	n.t.	n.t.	n.t.	0/4		n.t.	n.t.	neg	n.t.	n.t.	n.t.	n.t.		neg	neg	n.t.	n.t.	0/3		n.t.	n.t.	neg	32.81	n.t.	n.t.
Ba67	1	1	1	tooth, 44		n.t.	neg	n.t.	n.t.	n.t.	n.t.	n.t.	neg	n.t.	n.t.	n.t.	n.t.	neg	n.t.	neg	n.t.	n.t.	n.t.	0/4		n.t.	n.t.	neg	n.t.	n.t.	n.t.	n.t.		neg	neg	n.t.	n.t.	0/3		n.t.	n.t.	neg	33.26	n.t.	n.t.
100 copies					30.85	30.39	31.16	30.8	31.12	31.04	29.89		29.71	30.98	30.89	30.93		30.62		30.91	30.91	31.37	30.22			n.t.	pos	pos	pos	pos	pos			pos		pos	pos			32.79	n.t.	32.65	32.75	32.64	33.84
abbreviations:
n.t. = not tested
pos = positive
neg = negative
E = extraction control
B = Brandenburg
MP = Manching-Pichl
Ba = Basel, Switzerland
